# Supplementary material for: Oncogenic role of rab escort protein 1 through EGFR and STAT3 pathway
Source: PubMed Central journal article supplement (PMC5386492; doi:10.1038/cddis.2017.50), 2017-02-23

# Supplementary Figure S1

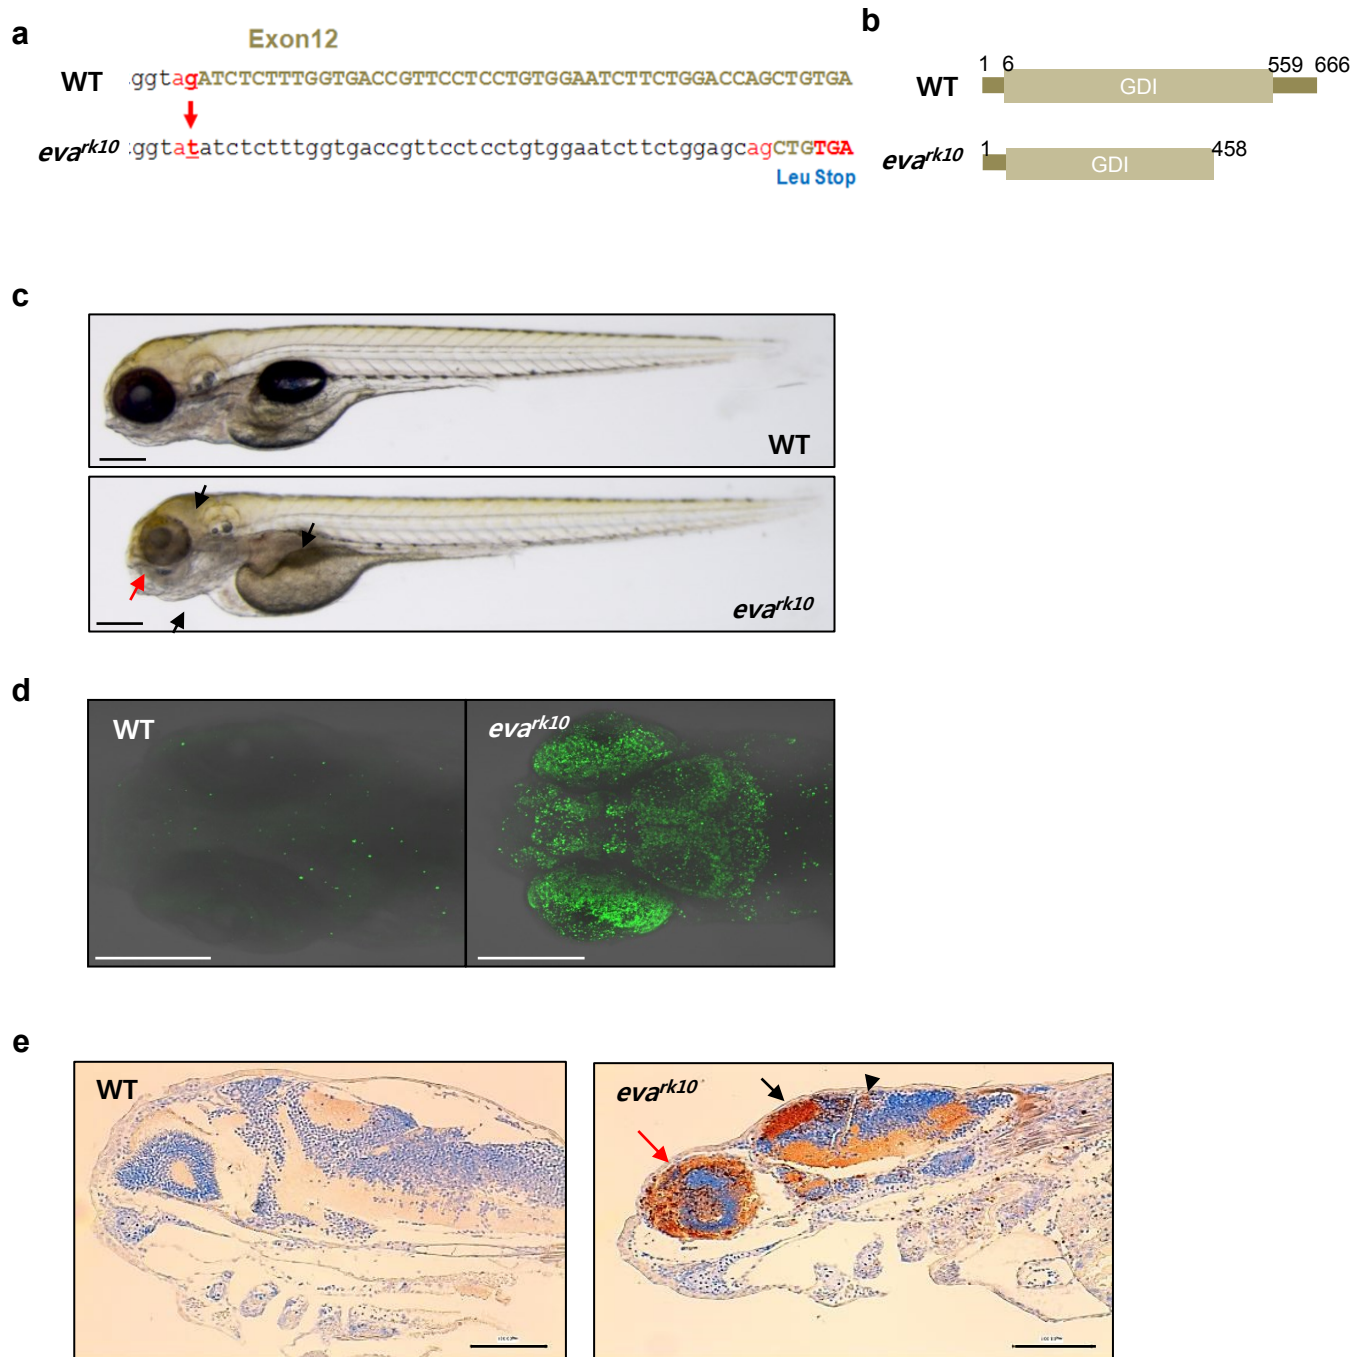

## Supplementary Figure S2

### Cervical cancer

---

REP1

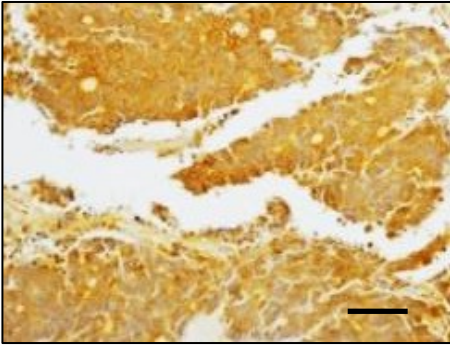

IgG

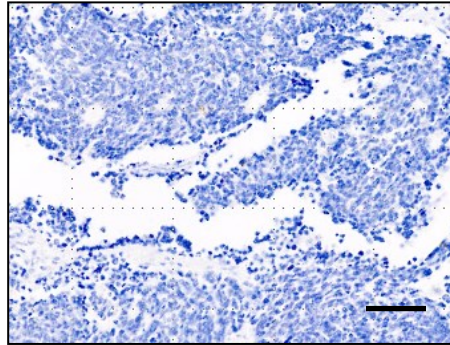

# Supplementary Figure S3

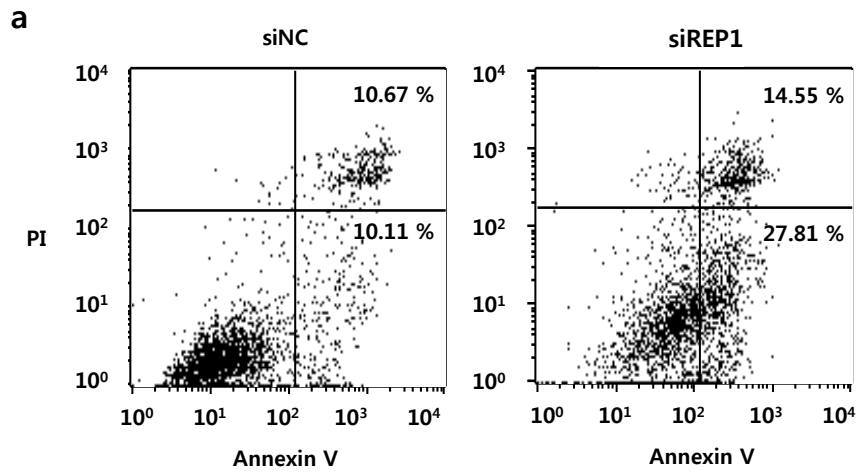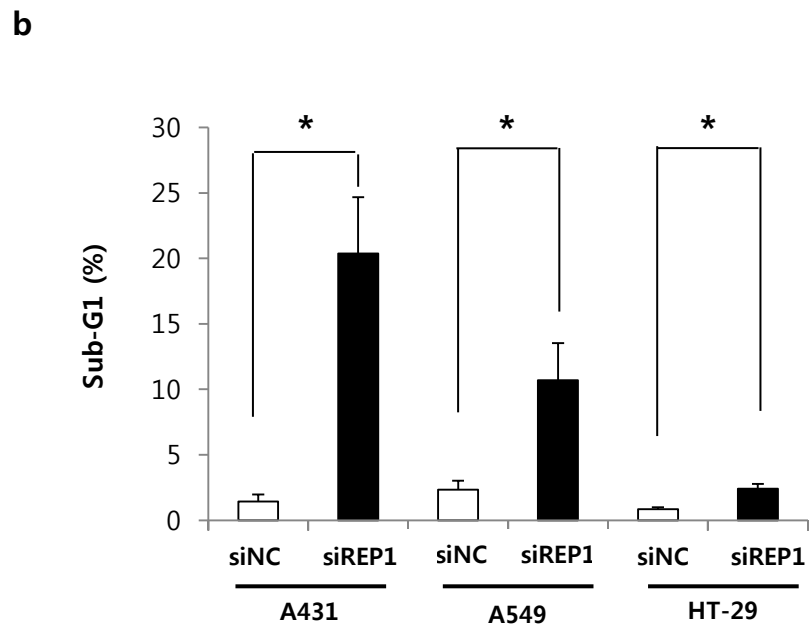

# Supplementary Figure S4

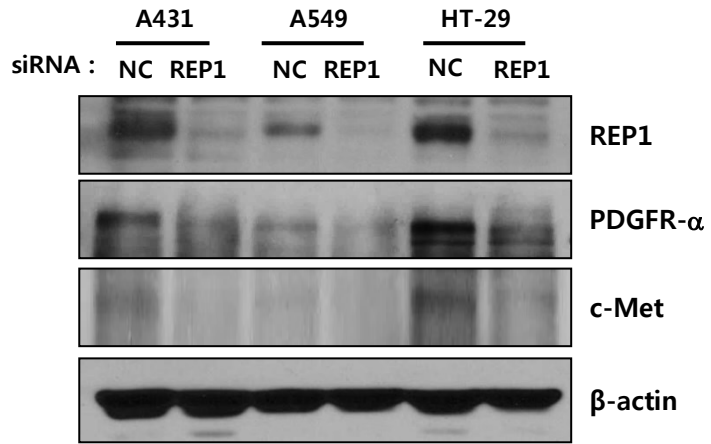

# Supplementary Figure S5

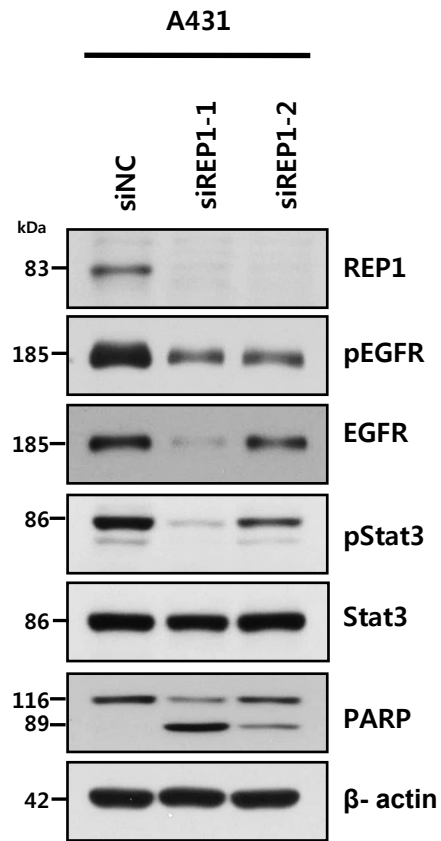

# Supplementary Figure S6

a

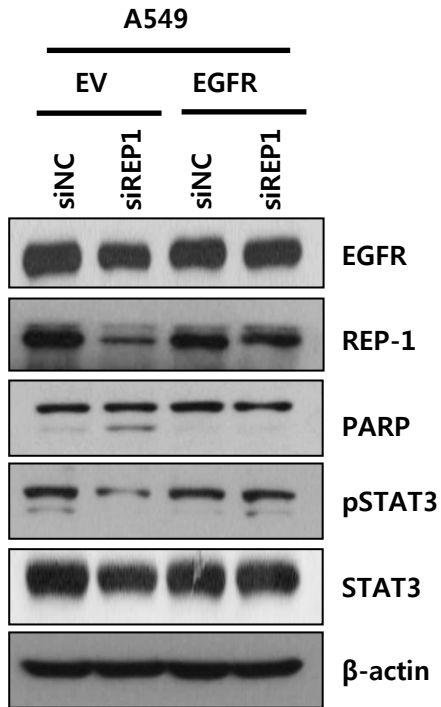

b

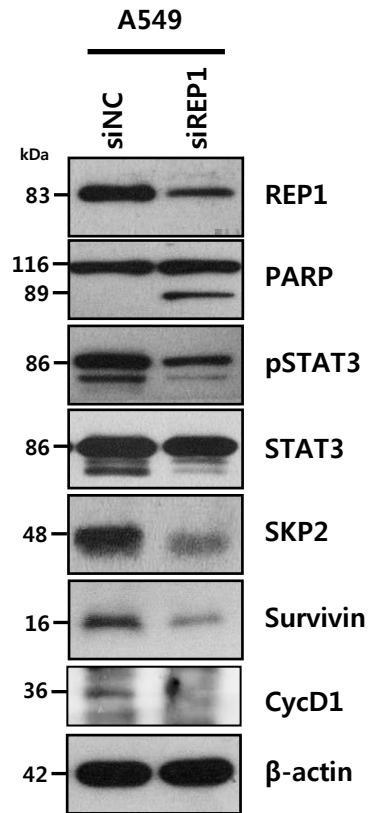

# Supplementary Figure S7

**a**

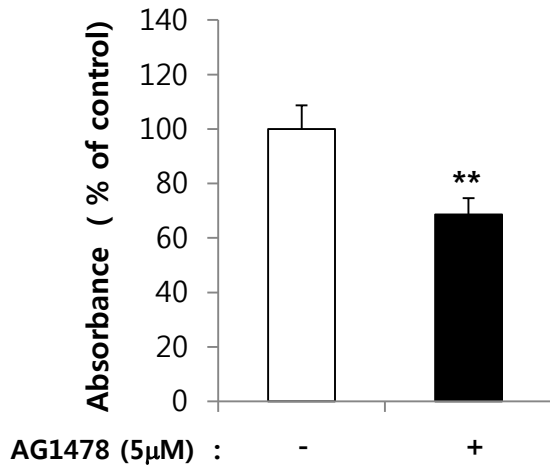

**b**

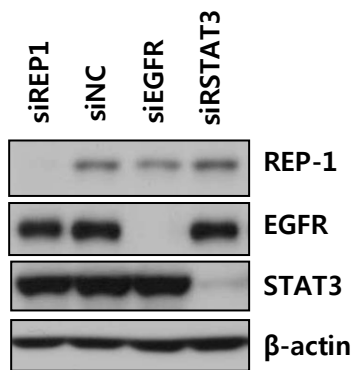

**c**

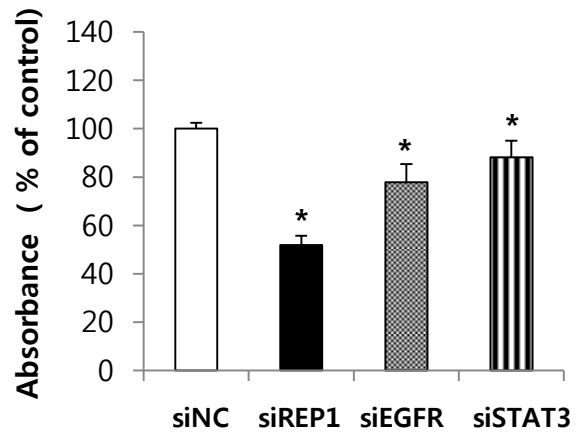

# Supplementary Figure S8

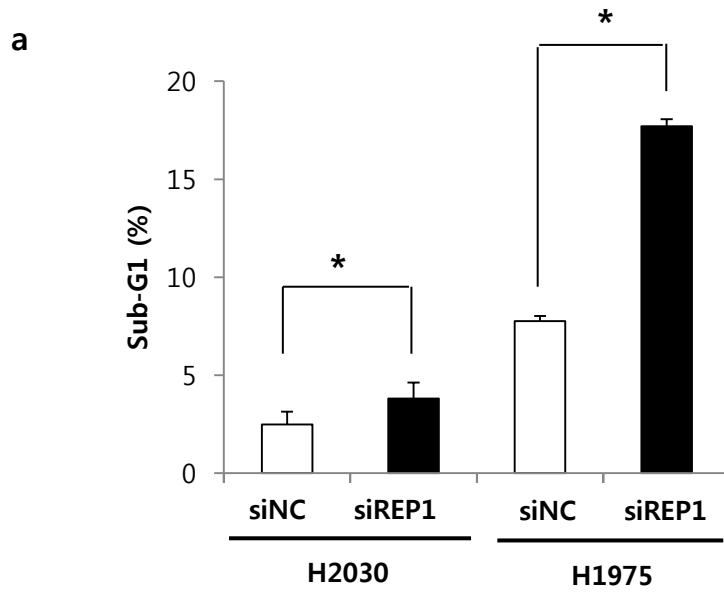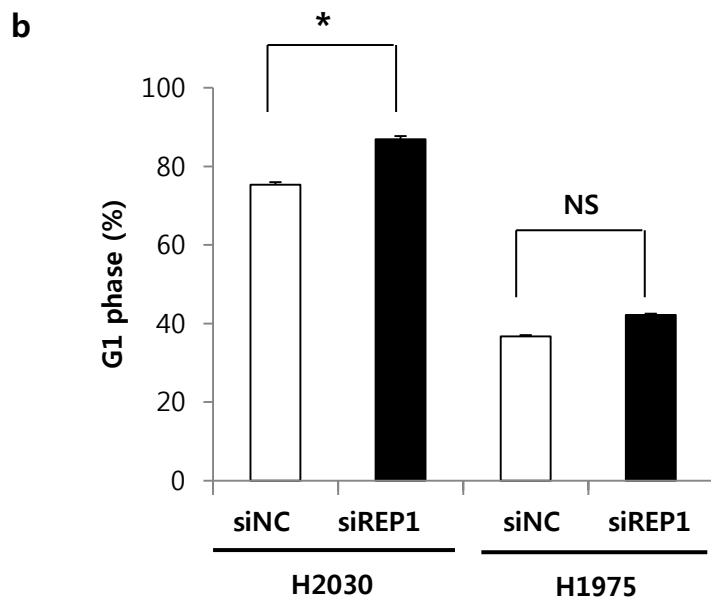



# Supplementary Figure S9

a

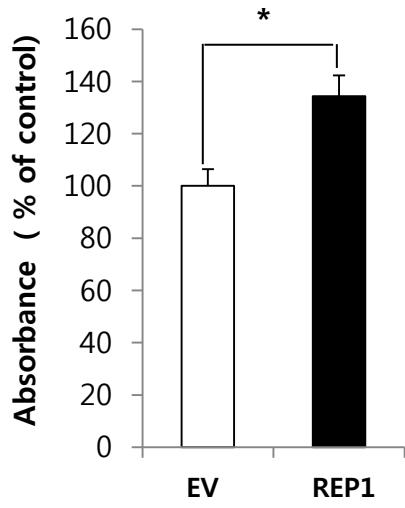

b

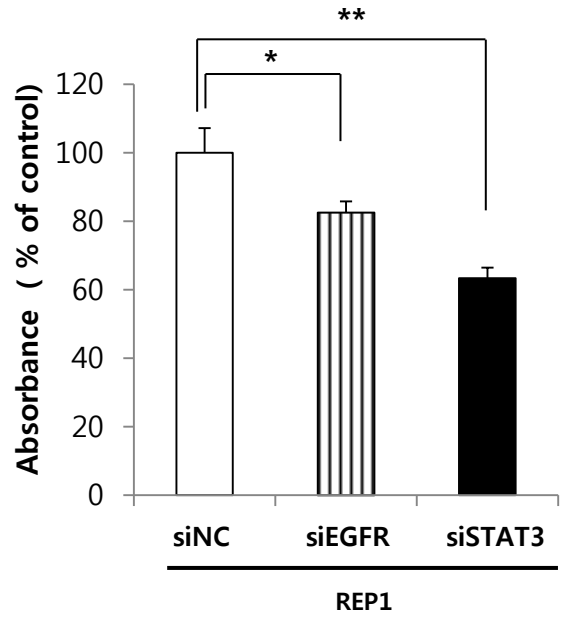

c

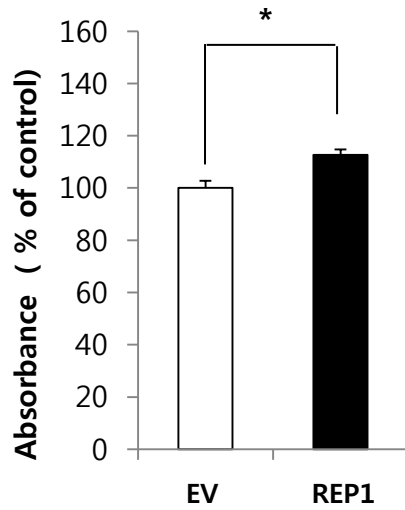

d

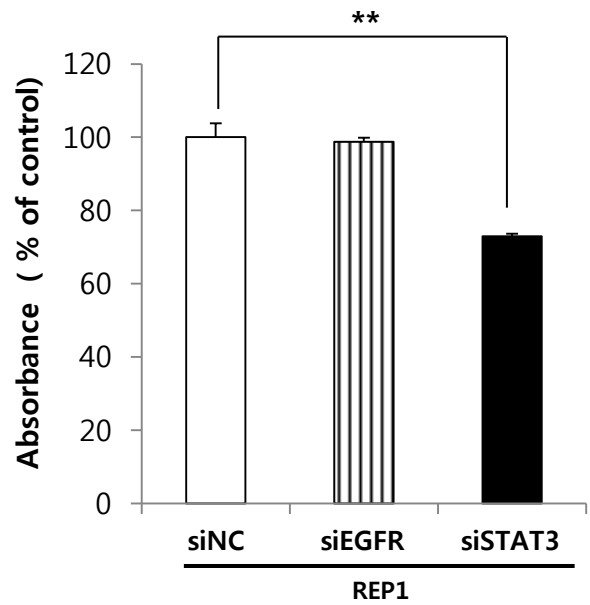

# Supplementary Figure S10

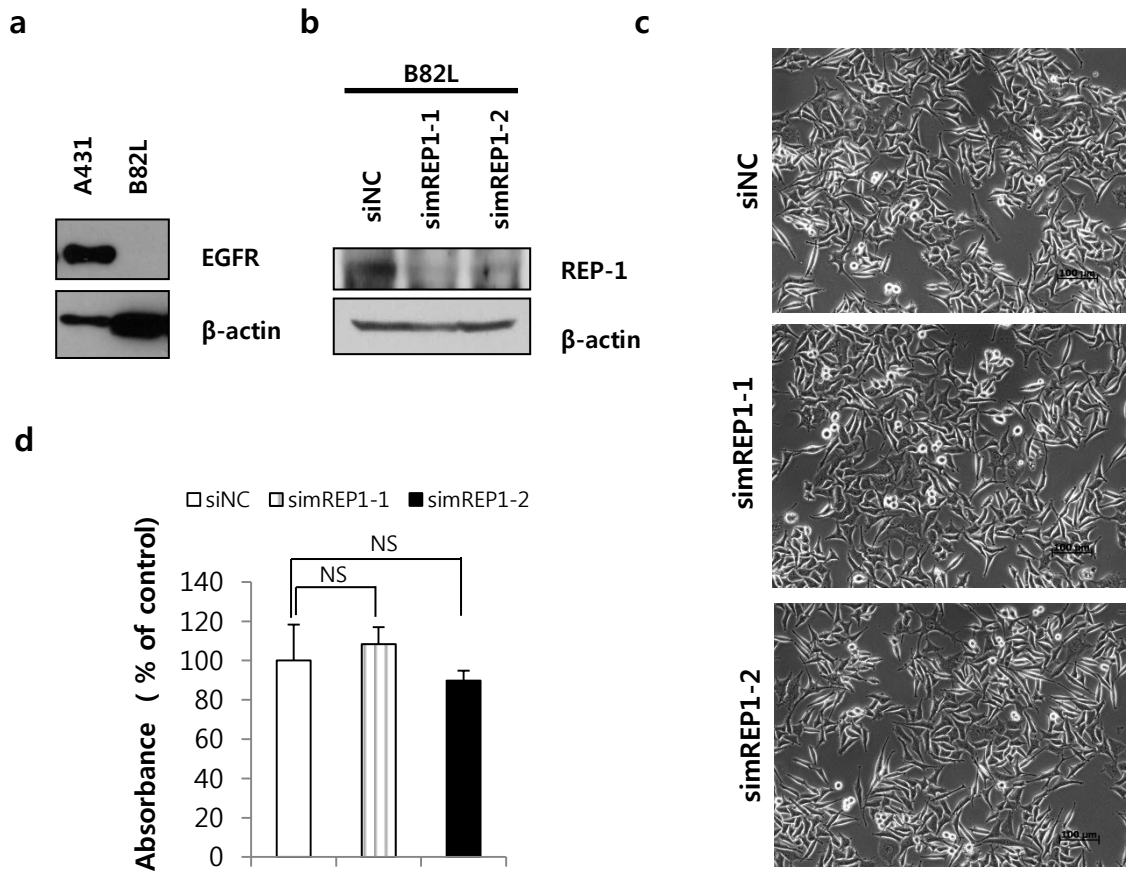

# Supplementary Figure S11

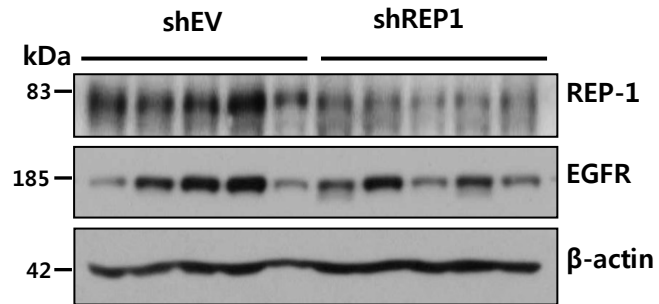

# Supplementary Figure S12

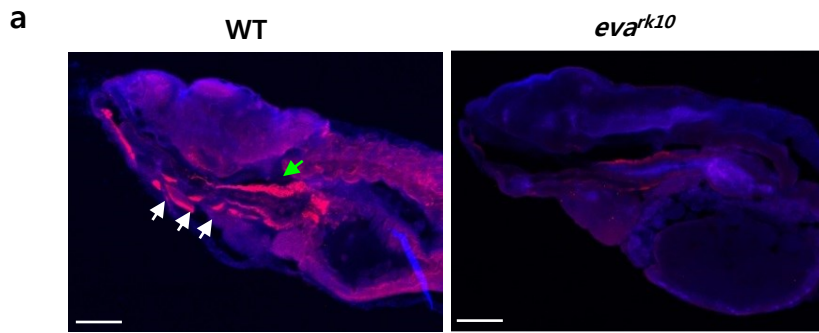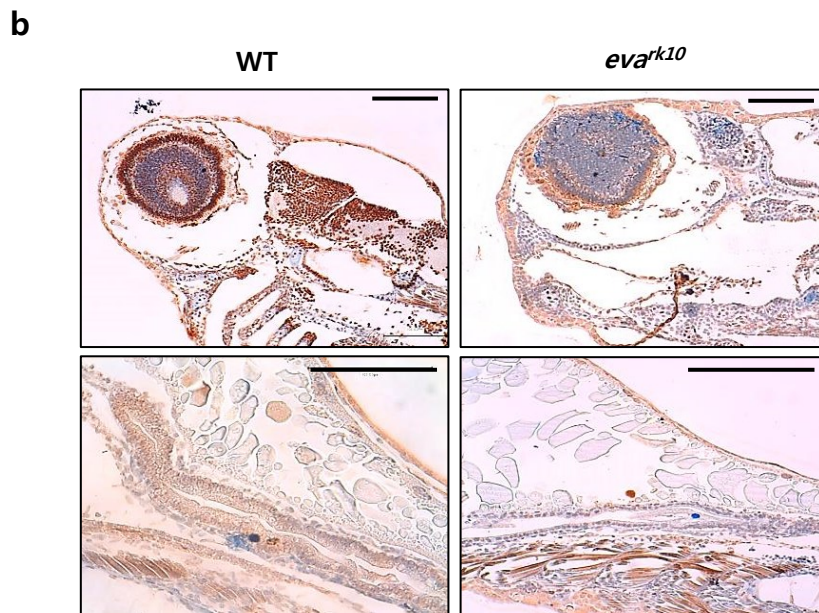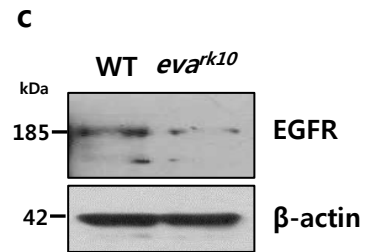

# Supplementary Figure S13

**a**

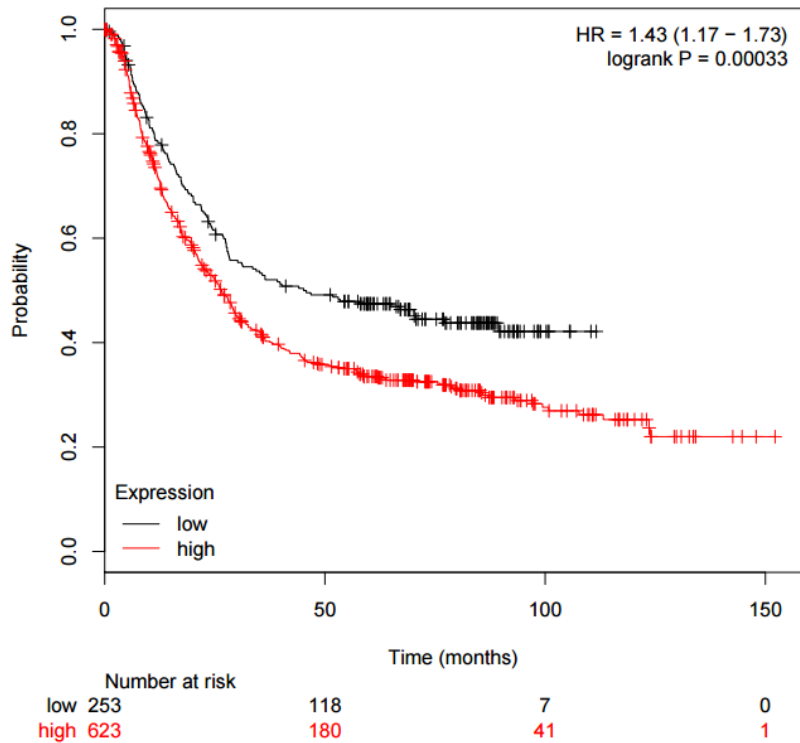

**b**

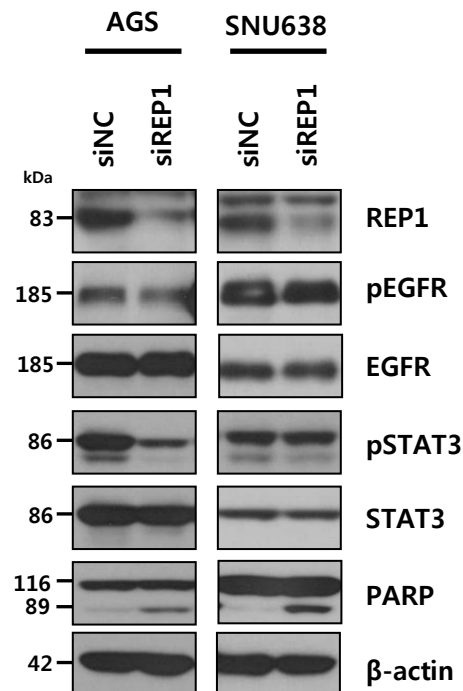

# Supplementary Figure S14

**a**

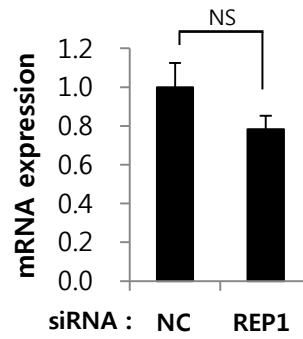

**b**

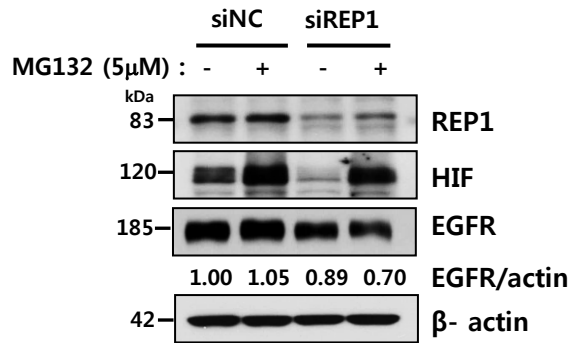

**c**

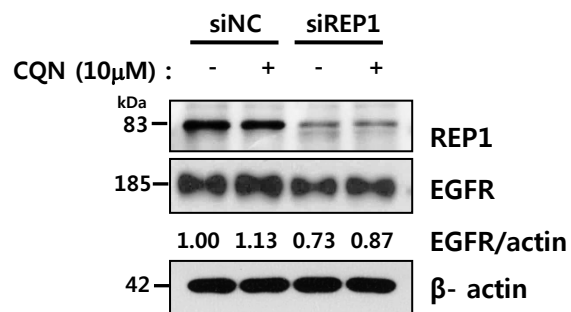

Supplementary Figure S15

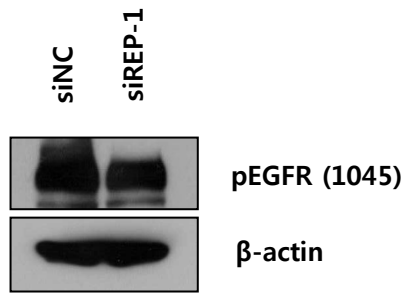

# Supplementary Figure S16

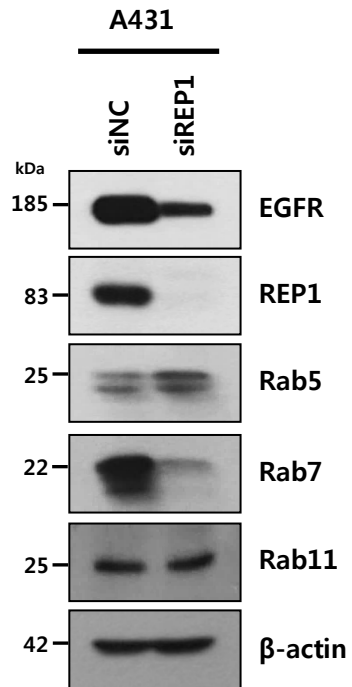

Supplement: cddis201750x3.pdf [file cddis201750x3.pdf]
